# Supplementary material for: All-in-one sequencing: an improved library preparation method for cost-effective and high-throughput next-generation sequencing
Source: PubMed Central journal article supplement (PMC7247233; doi:10.1186/s13007-020-00615-3), 2020-05-24
Supplement: 13007_2020_615_MOESM12_ESM.pdf [file 13007_2020_615_MOESM12_ESM.pdf]

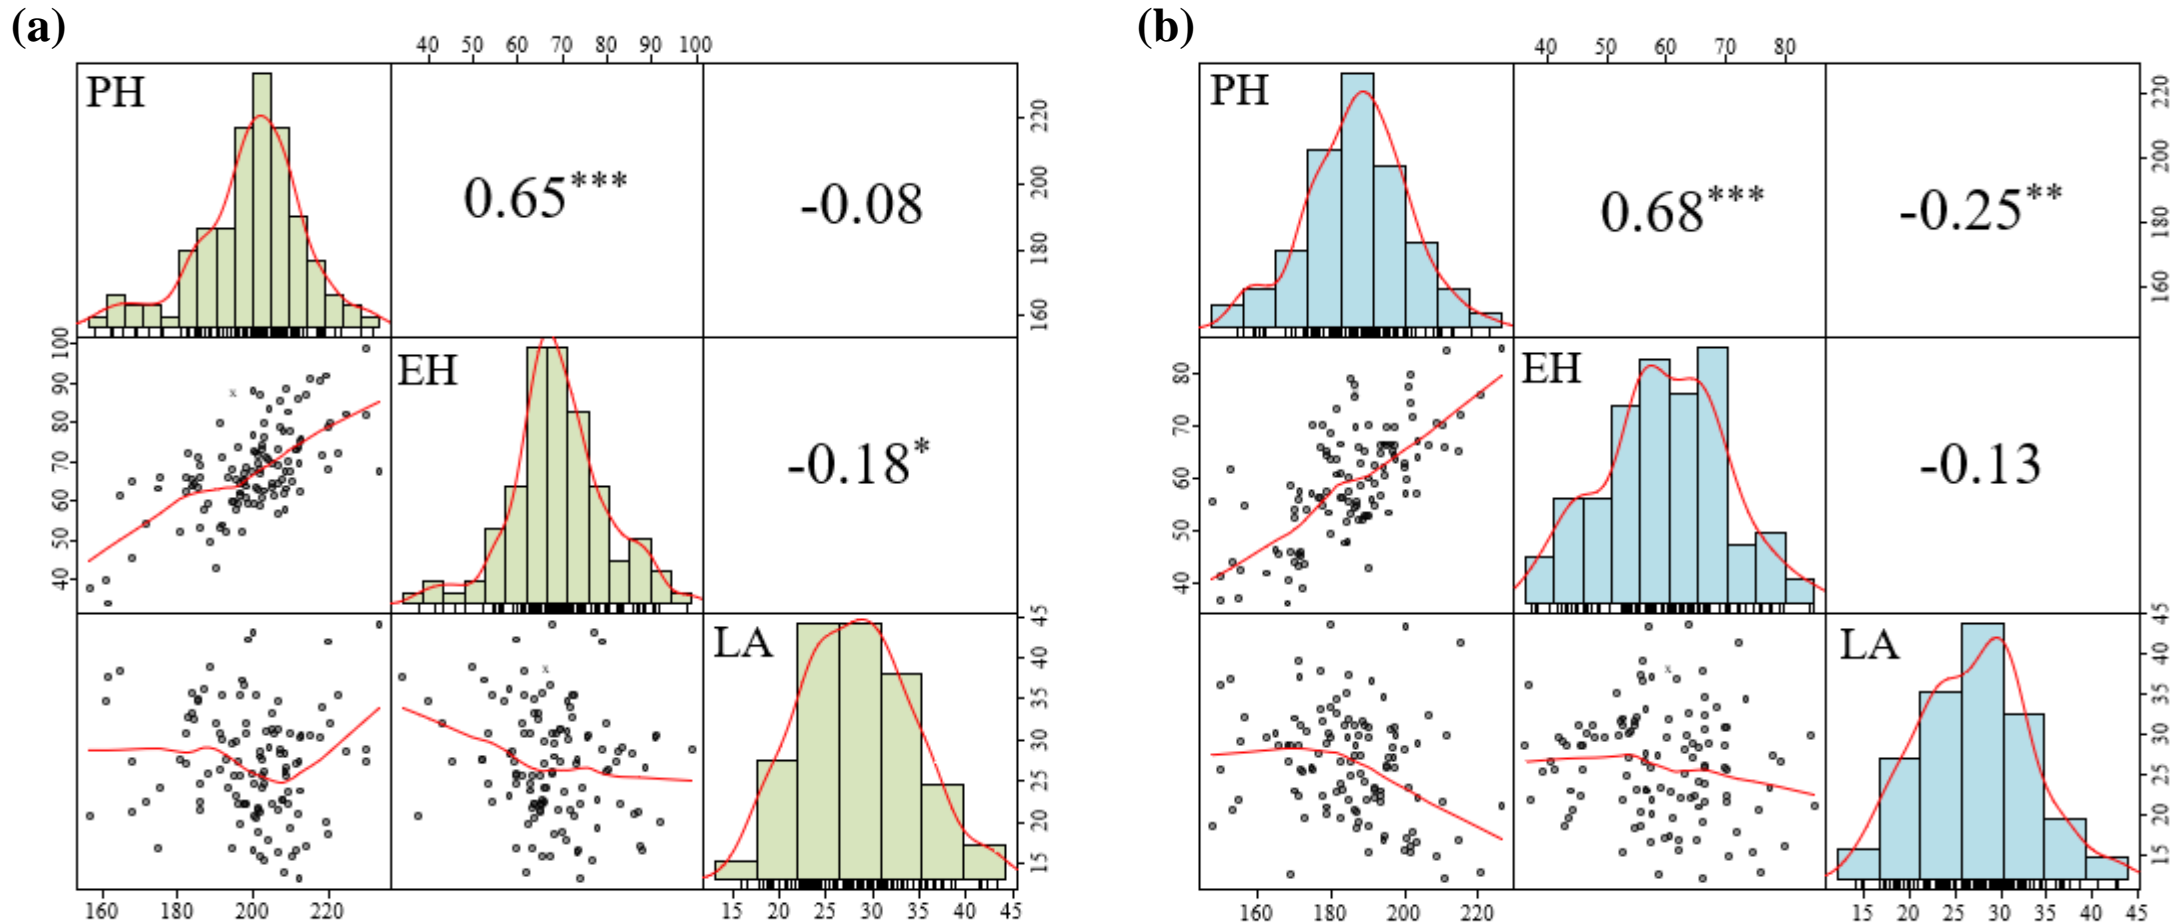

**Figure S3.** Correlation coefficients analysis of three traits in a maize  $BC_1F_4$  population across two years 2016 (a) and 2017 (b). PH for plant height; EH for ear height; LA for leaf angle. The histograms on the diagonal show the phenotypic distribution of three traits. The plots below the diagonal are scatter plots of compared traits, and the values above the diagonal are the pairwise Pearson's correlation coefficients between the traits. \*significant at  $P < 0.05$ ; \*\*significant at  $P < 0.01$ ; \*\*\*significant at  $P < 0.001$ .
